# Supplementary material for: Text Fingerprinting and Topic Mining in the Prescription Opioid Use Literature
Source: Research Square preprint supplement (doi:10.21203/rs.3.rs-318083/v1), 2021-03-18

# Supplemental Information Figure 1

1. 30 word clouds for prescription opioid dataset


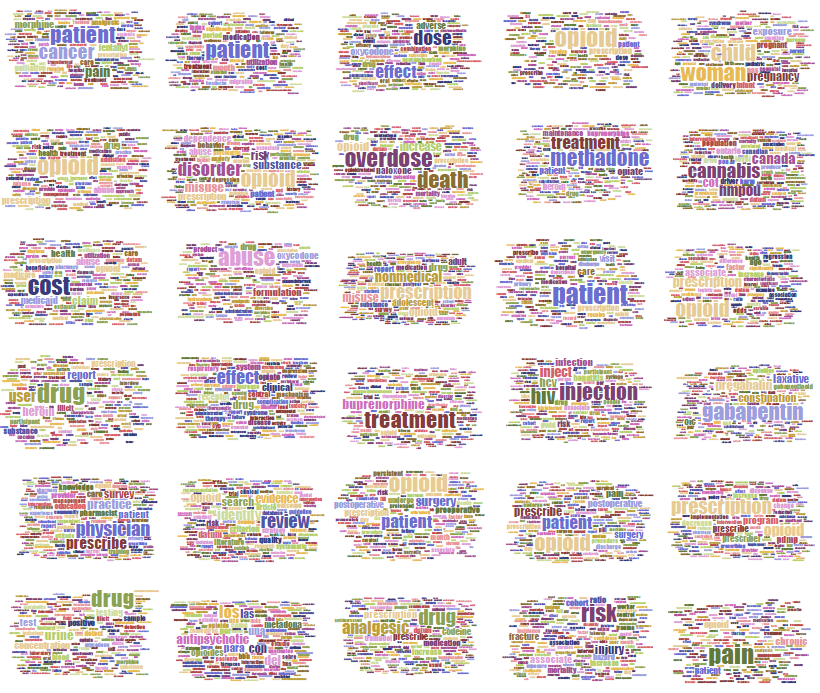


1. 35 word clouds for codeine dataset


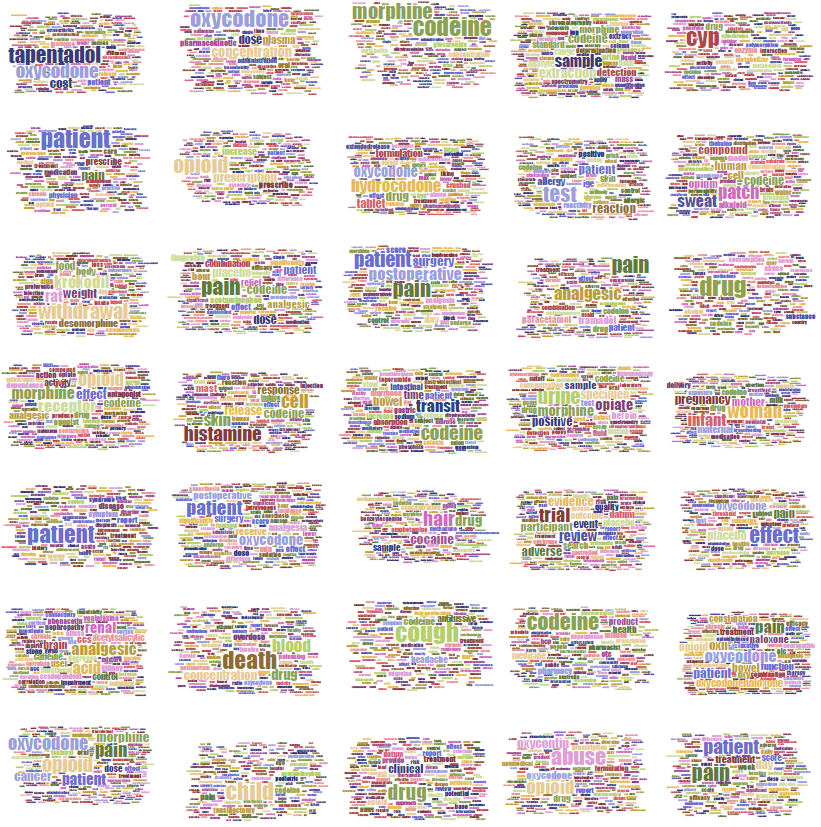


1. 40 word clouds for morphine dataset


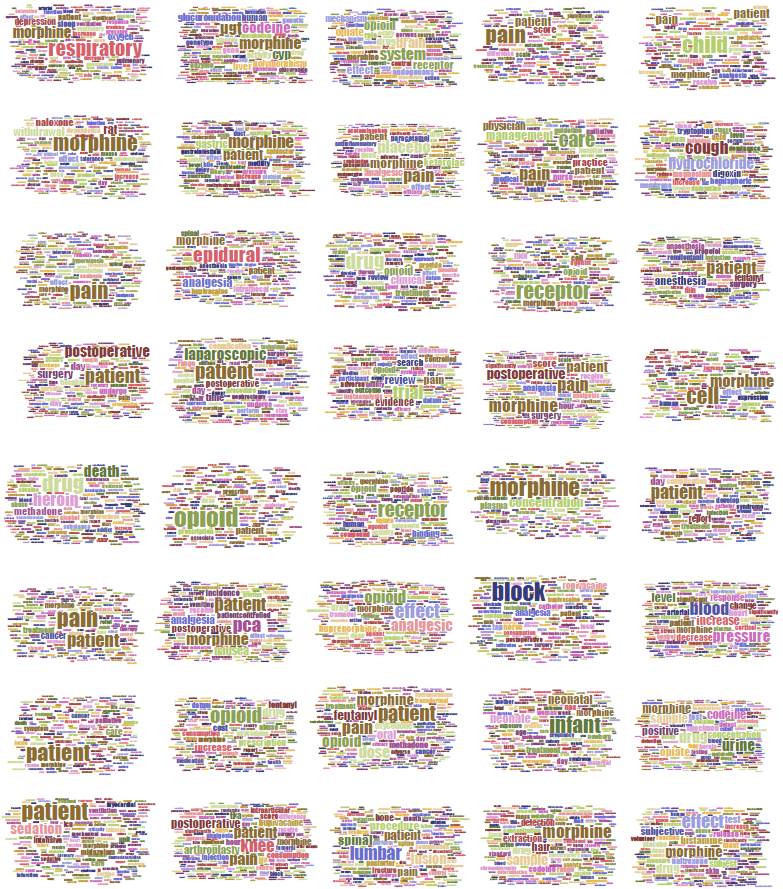


1. 25 word clouds for hydrocodone dataset


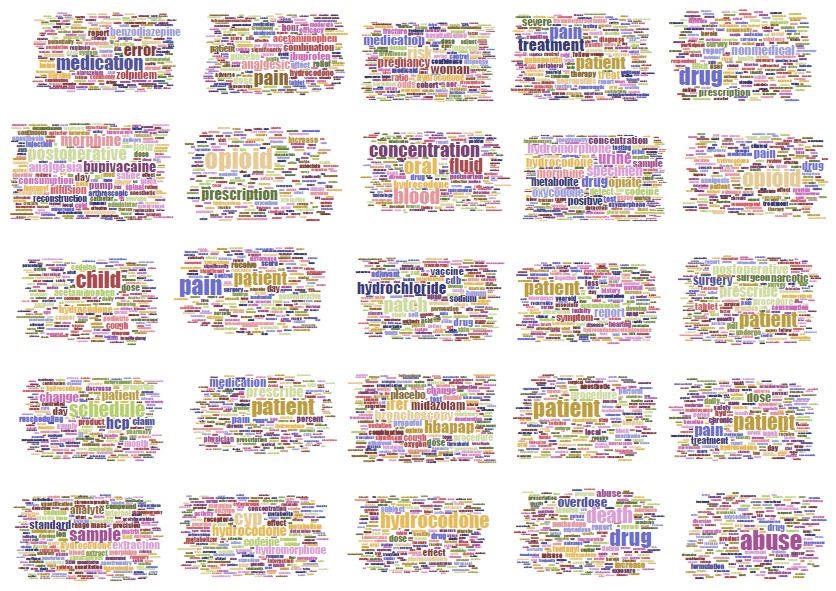


1. 35 word clouds for oxycodone dataset


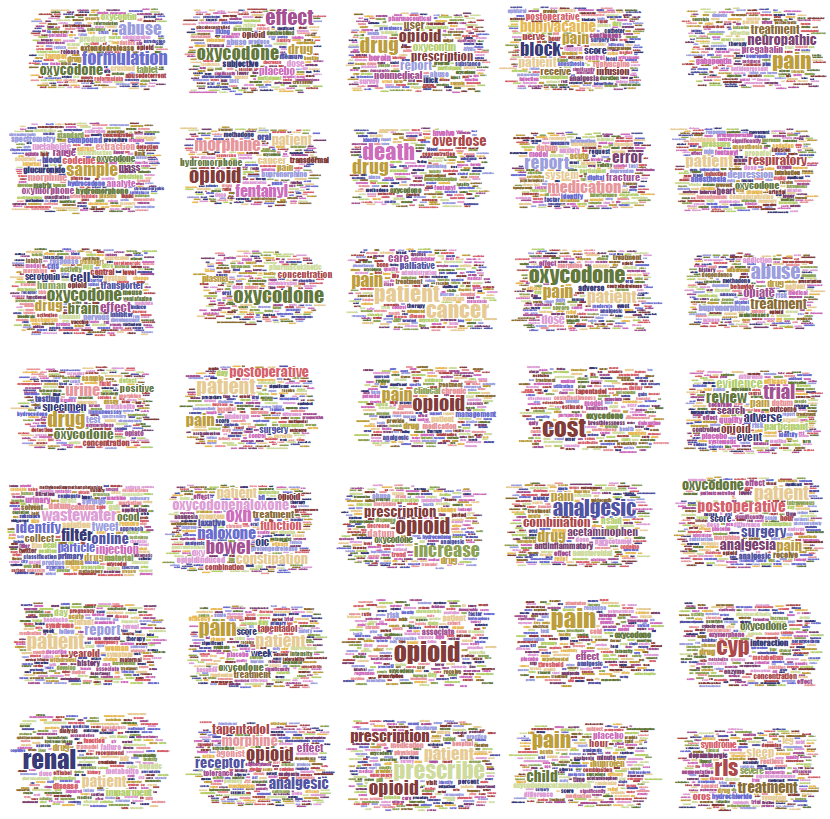


1. 40 word clouds for methadone dataset


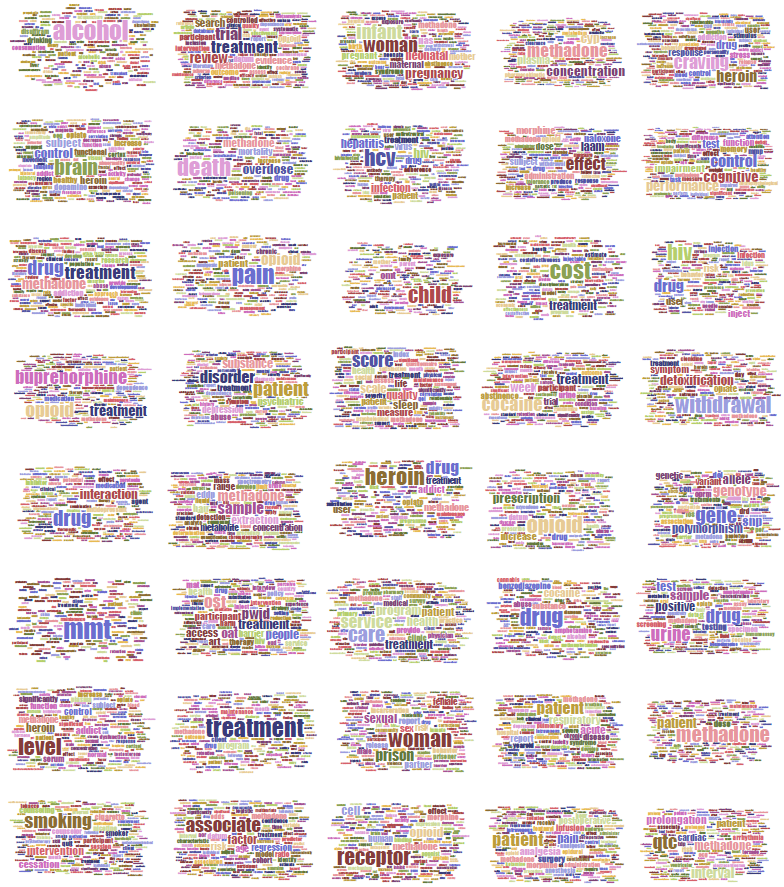

Supplement: Supplementary file 1 [file 5a30672b1cdb63ccd8c37126.docx]
